# Supplementary material for: Chromosome-level genome assembly of the diploid oat species Avena longiglumis
Source: PubMed Central journal article supplement (PMC11035610; doi:10.1038/s41597-024-03248-6), 2024-04-22
Supplement: 41597_2024_3248_MOESM1_ESM.pdf [file 41597_2024_3248_MOESM1_ESM.pdf]

## Supplementary Information

Chromosome-level genome assembly of the diploid oat species *Avena longiglumis*

Qing Liu<sup>1,2\*</sup>, Gui Xiong<sup>1,3</sup>, Ziwei Wang<sup>4</sup>, Yongxing Wu<sup>5</sup>, Tieyao Tu<sup>1,2</sup>, Trude Schwarzacher<sup>1,2,6</sup>, John Seymour Heslop-Harrison<sup>1,2,6\*</sup>

<sup>1</sup> State Key Laboratory of Plant Diversity and Specialty Crops / Guangdong Provincial Key Laboratory of Applied Botany, South China Botanical Garden, Chinese Academy of Sciences, Guangzhou 510650, China.

<sup>2</sup> South China National Botanical Garden, Guangzhou, China.

<sup>3</sup> University of Chinese Academy of Sciences, Beijing, China.

<sup>4</sup> School of Biology and Agriculture, Shaoguan University, Shaoguan, China.

<sup>5</sup> College of Agriculture, South China Agricultural University, Guangzhou, China.

<sup>6</sup> University of Leicester, Department of Genetics and Genome Biology, Institute for Environmental Futures, Leicester, UK.

\* Corresponding authors: Qing Liu (liuqing@scib.ac.cn); John Seymour Heslop-Harrison (phh4@le.ac.uk)

### Contents

**Supplementary Figure S1.** Strategy for sequencing, assembly and annotation of the *Avena longiglumis* genome.

**Supplementary Figure S2.** The result of k-mer analysis.

**Supplementary Figure S3.** KEGG enrichment of expanded genes in four *Avena* species.

**Supplementary Table S1.** Summary of sequencing libraries of *Avena longiglumis* included in the study.

**Supplementary Table S2.** Evaluation of gene space completeness by BUSCO analysis in the *A. longiglumis* genome assembly.

**Supplementary Table S3.** Statistics of gene function annotation of the *A. longiglumis* genome.

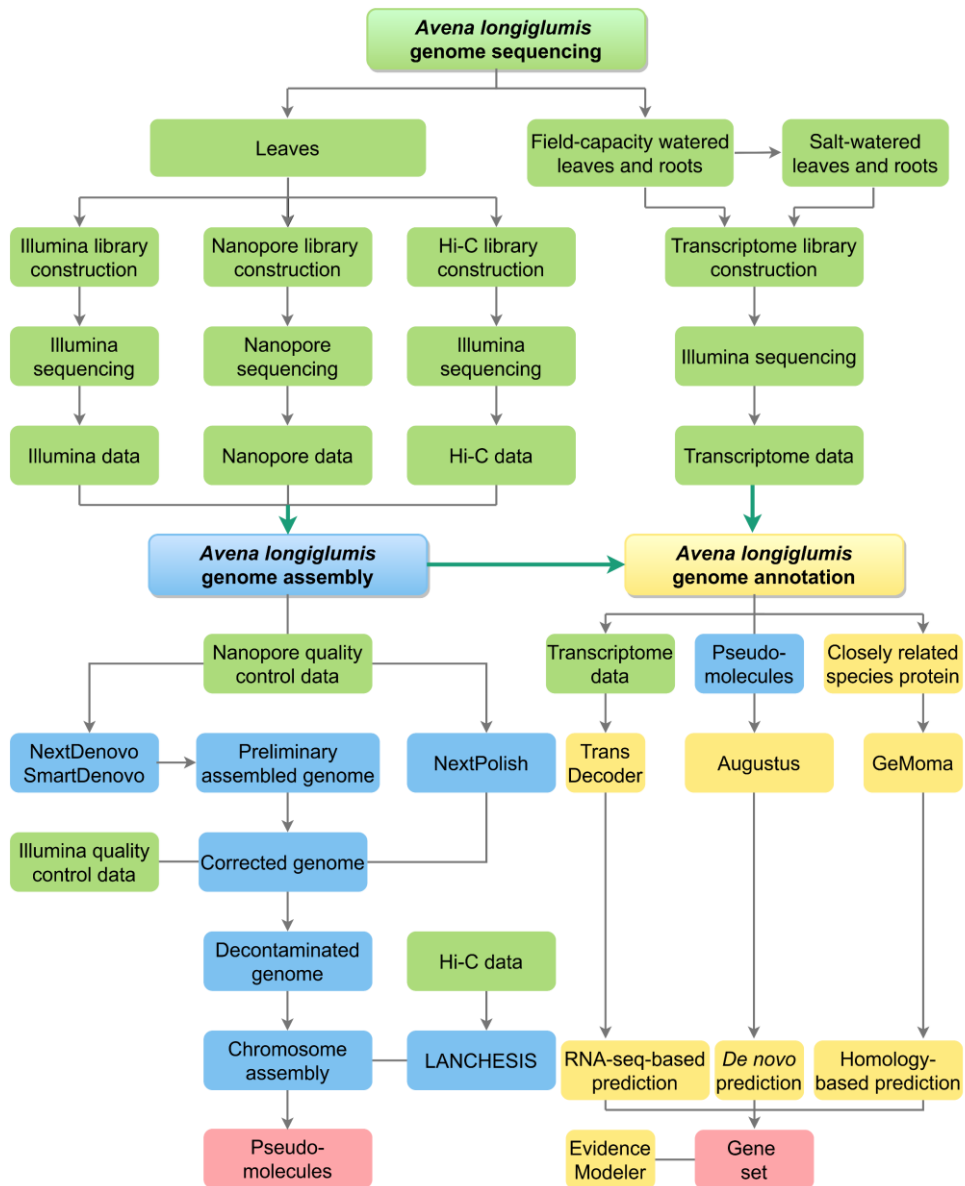

**Supplementary Figure S1.** Strategy for sequencing, assembly and annotation of the *Avena longiglumis* genome.

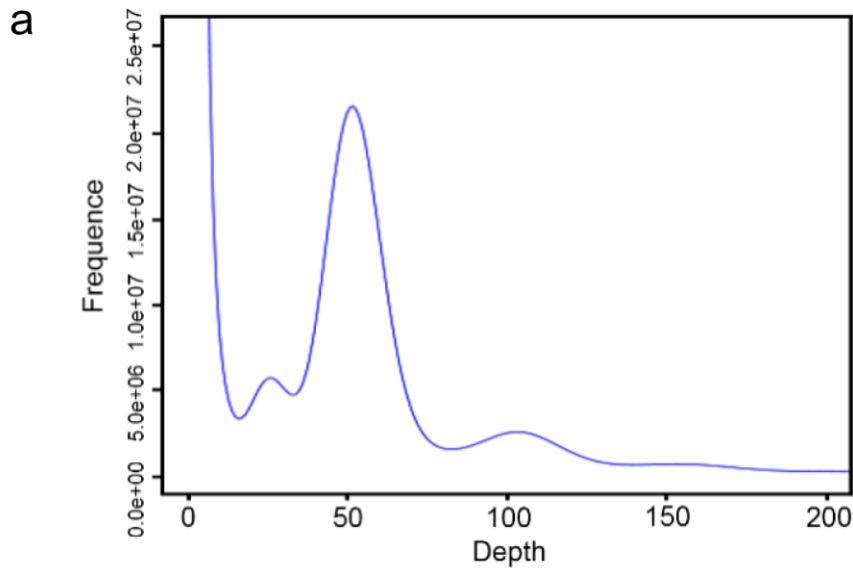

**b**

| K-mer | Depth | Number of k-mers | Genome size (bp) | Heterogygous rate (%) | Repeat rate (%) |
|-------|-------|------------------|------------------|-----------------------|-----------------|
| 17    | 52    | 208,164,726,959  | 3,965,670,000    | 0.48                  | 82.08           |

**Supplementary Figure S2.** The result of k-mer analysis. **(a)** The 17-mer frequency distribution in *A. longiglumis* genome. The x-axis is the k-mer depth, and y-axis represents the frequency of the k-mer for a given coverage. **(b)** Statistics of k-mer analysis.

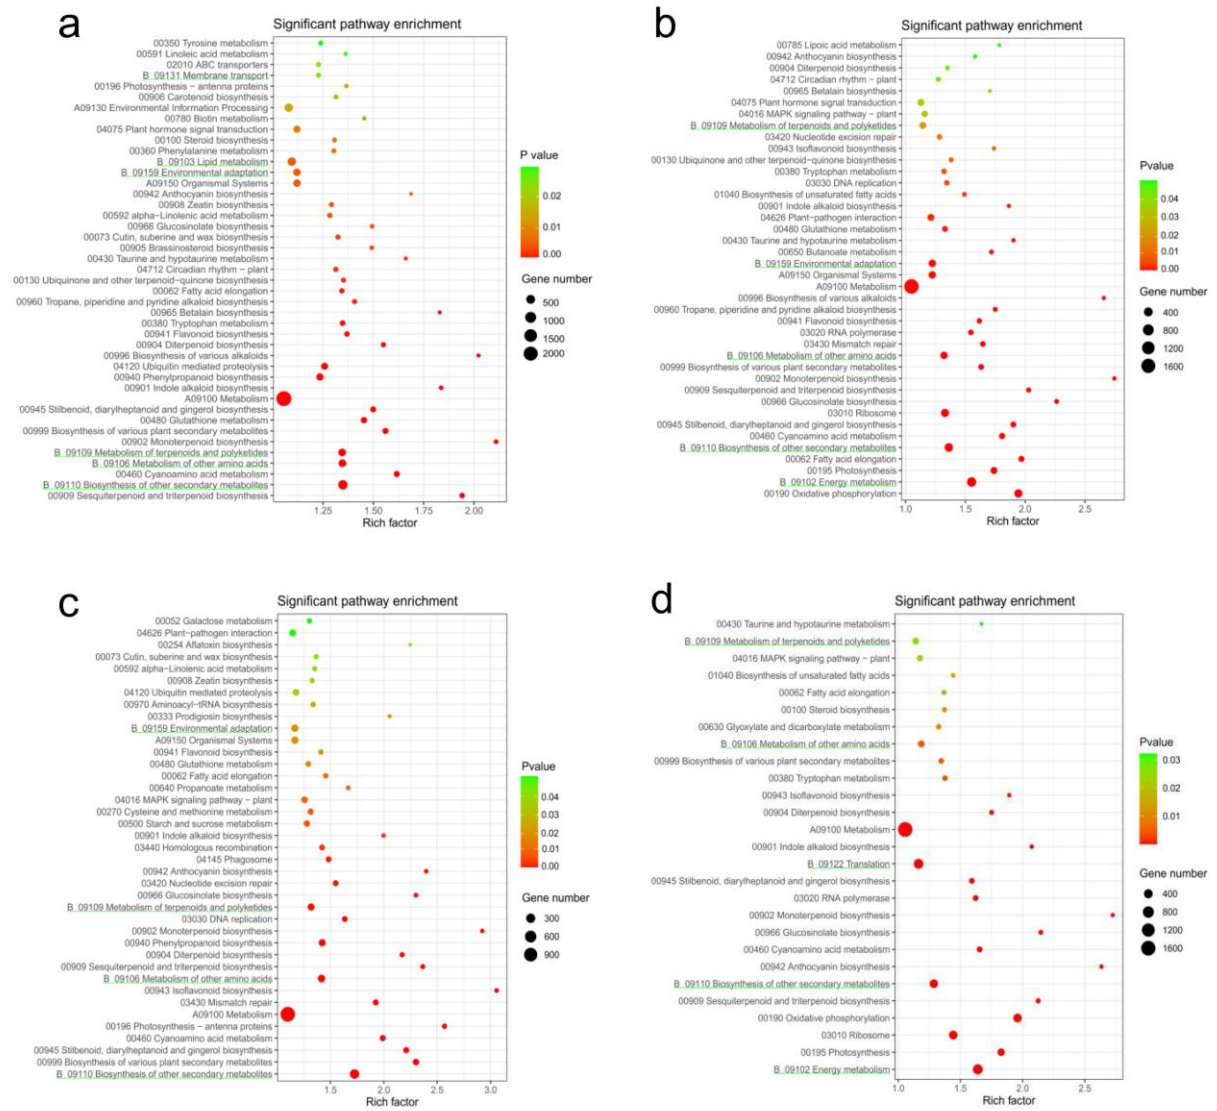

**Supplementary Figure S3.** KEGG enrichment of expanded genes in four *Avena* species. **(a)** *A. longiglumis* genome. **(b)** *A. atlantica* genome. **(c)** *A. strigosa* genome. **(d)** *A. eriantha* genome.

**Supplementary Table S1.** Summary of sequencing libraries of *Avena longiglumis* included in the study.

| Species               | Library                      | Type | Sample | Configuration     | Insertion (bp) | Platform            | Read count (Millions) | Total reads bases (bp) | Accession no. in NCBI |
|-----------------------|------------------------------|------|--------|-------------------|----------------|---------------------|-----------------------|------------------------|-----------------------|
| <i>A. longiglumis</i> | NDES00415_L4                 | gDNA | Leaf   | 2 × 150bp, paired | 350            | Illumina HiSeq 2500 | 895.0                 | 268,598,824,800        | SRR19279518           |
| Subtotal              |                              |      |        |                   |                |                     | 895.0                 | 268,598,824,800        |                       |
| <i>A. longiglumis</i> | 20190212-NPL0561-P1-E1-H1    | gDNA | Leaf   | 20–30 kbp         | > 23,000       | Nanopore PromethION | 3.2                   | 48,220,684,593         | SRR19279527           |
| <i>A. longiglumis</i> | 20190215-NPL0561-P1-E1-H1    | gDNA | Leaf   | 20–30 kbp         | > 23,000       | Nanopore PromethION | 2.7                   | 51,028,783,483         | SRR19279522           |
| <i>A. longiglumis</i> | 20190216-NPL0561-P1-A3-D3    | gDNA | Leaf   | 20–30 kbp         | > 23,000       | Nanopore PromethION | 1.2                   | 21,004,088,941         | SRR19279520           |
| <i>A. longiglumis</i> | 20190215-NPL0561-P1-A1-D1    | gDNA | Leaf   | 20–30 kbp         | > 23,000       | Nanopore PromethION | 4.6                   | 84,191,503,177         | SRR19279531           |
| <i>A. longiglumis</i> | 20190211-NPL0561-P1-E3-H3    | gDNA | Leaf   | 20–30 kbp         | > 23,000       | Nanopore PromethION | 3.6                   | 49,715,012,344         | SRR19279525           |
| <i>A. longiglumis</i> | 20190212-NPL0561-P2-A7-D7    | gDNA | Leaf   | 20–30 kbp         | > 23,000       | Nanopore PromethION | 3.7                   | 56,313,401,650         | SRR19279524           |
| <i>A. longiglumis</i> | 20190215-NPL0561-P1-A7-D7    | gDNA | Leaf   | 20–30 kbp         | > 23,000       | Nanopore PromethION | 1.4                   | 24,947,902,936         | SRR19279523           |
| <i>A. longiglumis</i> | 20190328-NPL0561-P2-E7-H7    | gDNA | Leaf   | 20–30 kbp         | > 23,000       | Nanopore PromethION | 2.1                   | 38,735,683,870         | SRR19279528           |
| <i>A. longiglumis</i> | 20190329-NPL0561-P1-E1-H1    | gDNA | Leaf   | 20–30 kbp         | > 23,000       | Nanopore PromethION | 2.4                   | 45,977,659,069         | SRR19279519           |
| <i>A. longiglumis</i> | 20190302-NPL0613-P1-A5-D5    | gDNA | Leaf   | 20–30 kbp         | > 23,000       | Nanopore PromethION | 2.5                   | 38,218,681,407         | SRR19279529           |
| <i>A. longiglumis</i> | 20190124-NPL0613-P2-A1-D1-ul | gDNA | Leaf   | 20–30 kbp         | > 23,000       | Nanopore PromethION | 2.1                   | 22,158,343,522         | SRR19279526           |
| <i>A. longiglumis</i> | 20190221-NPL0613-P2-E1-H1    | gDNA | Leaf   | 20–30 kbp         | > 23,000       | Nanopore PromethION | 1.7                   | 30,848,177,162         | SRR19279530           |
| Subtotal              |                              |      |        |                   |                |                     | 31.2                  | 511,359,922,154        |                       |

|                       |               |           |      |                        |     |                          |        |                 |             |
|-----------------------|---------------|-----------|------|------------------------|-----|--------------------------|--------|-----------------|-------------|
| <i>A. longiglumis</i> | 447_18L3A026  | gDNA, HiC | Leaf | 2 × 150 bp, 450 paired | 450 | Illumina<br>Novaseq 6000 | 87.3   | 26,195,252,100  | SRR19279533 |
| <i>A. longiglumis</i> | 447_19L3A027  | gDNA, HiC | Leaf | 2 × 150 bp, 450 paired | 450 | Illumina<br>Novaseq 6000 | 75.4   | 22,623,619,200  | SRR19279514 |
| <i>A. longiglumis</i> | B447_5L4A005  | gDNA, HiC | Leaf | 2 × 150 bp, 450 paired | 450 | Illumina<br>Novaseq 6000 | 77.5   | 23,238,770,100  | SRR19279517 |
| <i>A. longiglumis</i> | B447_6L4A006  | gDNA, HiC | Leaf | 2 × 150 bp, 450 paired | 450 | Illumina<br>Novaseq 6000 | 105.9  | 31,771,530,300  | SRR19279516 |
| <i>A. longiglumis</i> | B447_16L4A024 | gDNA, HiC | Leaf | 2 × 150 bp, 450 paired | 450 | Illumina<br>Novaseq 6000 | 77.0   | 23,104,664,100  | SRR19279521 |
| <i>A. longiglumis</i> | B447_18L3A026 | gDNA, HiC | Leaf | 2 × 150 bp, 450 paired | 450 | Illumina<br>Novaseq 6000 | 227.0  | 68,092,406,400  | SRR19279515 |
| <i>A. longiglumis</i> | B447_19L3A027 | gDNA, HiC | Leaf | 2 × 150 bp, 450 paired | 450 | Illumina<br>Novaseq 6000 | 204.3  | 61,297,082,100  | SRR19279532 |
| <i>A. longiglumis</i> | B447_5L3A005  | gDNA, HiC | Leaf | 2 × 150 bp, 450 paired | 450 | Illumina<br>Novaseq 6000 | 207.6  | 62,277,830,400  | SRR19279512 |
| <i>A. longiglumis</i> | B447_6L3A006  | gDNA, HiC | Leaf | 2 × 150 bp, 450 paired | 450 | Illumina<br>Novaseq 6000 | 210.5  | 63,160,123,500  | SRR19279511 |
| <i>A. longiglumis</i> | B447_16L3A024 | gDNA, HiC | Leaf | 2 × 150 bp, 450 paired | 450 | Illumina<br>Novaseq 6000 | 180.0  | 53,874,397,500  | SRR19279513 |
| Subtotal              |               |           |      |                        |     |                          | 1452.5 | 435,635,675,700 |             |
| <i>A. longiglumis</i> | ALO_L1        | RNA-seq   | Leaf | 2 × 150 bp, 450 paired | 450 | Illumina<br>Novaseq 6000 | 53.5   | 16,035,567,600  | SRR24234795 |
|                       | ALO_L2        | RNA-seq   | Leaf | 2 × 150 bp, 450 paired | 450 | Illumina<br>Novaseq 6000 | 58.0   | 17,414,147,100  | SRR24234796 |
|                       | ALO_L3        | RNA-seq   | Leaf | 2 × 150 bp, 450 paired | 450 | Illumina<br>Novaseq 6000 | 64.2   | 19,270,228,500  | SRR24234797 |
| <i>A. longiglumis</i> | ALO_R1        | RNA-seq   | Root | 2 × 150 bp, 450 paired | 450 | Illumina<br>Novaseq 6000 | 60.3   | 18,089,824,800  | SRR24234802 |
|                       | ALO_R2        | RNA-seq   | Root | 2 × 150 bp, 450 paired | 450 | Illumina<br>Novaseq 6000 | 45.4   | 13,622,818,200  | SRR24234803 |
|                       | ALO_R3        | RNA-seq   | Root | 2 × 150 bp, 450 paired | 450 | Illumina<br>Novaseq 6000 | 48.5   | 14,552,806,200  | SRR24234804 |

Subtotal

329.9

98,985,392,400

---

**Supplementary Table S2.** Evaluation of gene space completeness by BUSCO analysis in the *A. longiglumis* genome assembly.

| Features                            | Based on whole genome sequences |
|-------------------------------------|---------------------------------|
| Complete BUSCOs (C)                 | 1,597 (99.00%)                  |
| Complete and single-copy BUSCOs (S) | 1,313 (81.40%)                  |
| Complete and duplicated BUSCOs (D)  | 284 (17.60%)                    |
| Fragmented BUSCOs (F)               | 3 (0.20%)                       |
| Missing BUSCOs (M)                  | 14 (0.80%)                      |
| Total BUSCO groups searched         | 1,614                           |



**Supplementary Table S3.** Statistics of gene function annotation of the *A. longiglumis* genome.

| Databases (Full name)                                                          | Number | Percentage |
|--------------------------------------------------------------------------------|--------|------------|
| NCBI NR (Non-redundant protein)                                                | 39,390 | 96.44%     |
| EggNOG (Evolutionary genealogy of genes: non-supervised orthologous groups)    | 38,078 | 93.23%     |
| Pfam (Pfam protein families)                                                   | 35,573 | 87.09%     |
| COG (Clusters of orthologous groups)                                           | 35,460 | 86.82%     |
| SwissProt (Swiss Institute of Bioinformatics and Protein Information Resource) | 32,099 | 78.59%     |
| GO (Gene ontology)                                                             | 21,162 | 51.81%     |
| KOG (EuKaryotic orthologous groups)                                            | 20,756 | 50.82%     |
| KEGG (Kyoto encyclopedia of genes and genomes)                                 | 17,285 | 42.32%     |
| PlantTFDB (Plant transcription factor)                                         | 2,403  | 5.88%      |
| CAZy (Carbohydrate-Active enZymes)                                             | 931    | 2.28%      |
| Number of annotated genes                                                      | 39,558 | 96.85%     |
| Number of predicted genes                                                      | 40,845 | 100%       |
